# Supplementary material
Source: PubMed Central journal article supplement (PMC3026725)
Supplement: JCI43758sd.pdf [file JCI43758sd.pdf]

## Supplementary Information

GGTase-I deficiency hyperactivates macrophages and induces erosive arthritis in mice

**Omar M. Khan, Mohamed X. Ibrahim, Ing-Marie Jonsson, Christin Karlsson, Meng Liu, Anna-Karin M. Sjogren, Frida J. Olofsson, Mikael Brisslert, Sofia Andersson, Claes Ohlsson, Lillemor Mattsson Hultén, Maria Bokarewa, and Martin O. Bergo**

## **SUPPLEMENTARY METHODS**

### **Computerized Tomography**

Peripheral quantitative computerized tomography (PQCT) scans were performed *ex vivo* on the tibia with a PQCT XCT RESEARCH M (version 4.5B; Norland), operating at a resolution of 70  $\mu\text{m}$  as described (1). For quantification of trabecular bone mineral density (BMD), the scan was performed in the metaphyseal part of the proximal tibia; for cortical bone parameters, the scan was performed in the mid-diaphyseal region. Micro-CT analyses were performed on the distal femur with a Skyscan 1072 scanner (SkyScan) and imaged with an X-ray tube (100 kV, 98  $\mu\text{A}$ ). The scanning angular rotation was 180°, the angular increment was 0.90°, and the isotropic volume-pixel size was 6.51  $\mu\text{m}$ . Images were generated by reconstructing datasets with a modified Feldkamp algorithm and segmenting them into binary images by adaptive local thresholding.

### **T lymphocyte–dependent and –independent immune responses in vivo**

T lymphocyte–independent inflammation was induced by injecting 30  $\mu\text{l}$  of olive oil in a hind paw which primarily recruits neutrophils. The thickness of the paw was measured before and 24 h after the injection (2). T lymphocyte–dependent inflammation was evaluated with the delayed-type hypersensitivity reaction induced by 4-ethoxymethylene-2-phenyloxazolone as described (2).

### **Immunocytochemistry**

Differentiated BM macrophages were plated in 8-well chamber slides ( $10^4$  cells/well). The cells were incubated with 10  $\mu\text{M}$  GGTI-298 (Sigma, G5169) and 5  $\mu\text{M}$  FTI (Lonafarnib, Schering-Plough) for 16 h. Cells were fixed in methanol and incubated with antibodies recognizing RAC1 (ARC03) as described in Methods and prelamin A as described (3).

## SUPPLEMENTARY REFERENCES

1. Windahl, SH, Vidal, O, Andersson, G, Gustafsson, JA, and Ohlsson, C. Increased cortical bone mineral content but exchanged trabecular bone mineral density in female ER beta(-/-) mice. *J. Clin. Invest.* 1999;104:895–901.
2. Verdrengh, M, Jonsson, IM, Holmdahl, R, and Tarkowski, A. Genistein as an anti-inflammatory agent. *Inflamm. Res.* 2003;52:341–346.
3. Liu, M, et al. Targeting the protein prenyltransferases efficiently reduces tumor development in mice with K-RAS-induced lung cancer. *Proc. Natl. Acad. Sci. U S A* 2010;107:6471–6476.

## SUPPLEMENTARY FIGURE LEGENDS

**Supplementary Figure 1** (A) Micro-CT scans of the distal femur showing the articular surface of the knee joint of a *Pggt1b<sup>fl/+</sup>LC* and a *Pggt1b<sup>fl/fl</sup>LC* mouse. Arrows indicate site of erosion. (B,C,D) PQCT scanning was used to quantify trabecular bone mineral density (BMD) (B), cortical BMD (C), and cortical thickness (D) in the tibia of 12-week-old *Pggt1b<sup>fl/+</sup>LC* and *Pggt1b<sup>fl/fl</sup>LC* mice ( $n = 10/\text{genotype}$ ). (E) Hematoxylin and eosin–stained sections of tissues from 12-week-old *Pggt1b<sup>fl/+</sup>LC* and *Pggt1b<sup>fl/fl</sup>LC* mice. Similar histology was seen in four additional mice/genotype. Scale bar, 400  $\mu\text{m}$ . (F) Immunohistochemical staining of lung and bone marrow sections of 12-week-old mice to document the specificity of the non-prenylated (np)-RAP1A antibody. Note the absence of staining in tissues from a control *Pggt1b<sup>fl/+</sup>LC* mouse. Scale bar, 35  $\mu\text{m}$ . (G) Neutrophil infiltration measured as an increase in paw thickness of mice injected subcutaneously with olive oil ( $n = 5/\text{genotype}$ ). (H) T lymphocyte–dependent inflammation measured as an increase in ear thickness after an oxa-mediated delayed-type hypersensitivity reaction ( $n = 5/\text{genotype}$ ). Data are expressed as mean  $\pm$  SEM.

**Supplementary Figure 2** (A) Hematoxylin and eosin–stained sections of joints from wild-type (8 weeks old at transplant) and *Pggt1b<sup>fl/fl</sup>LC* (12 weeks old at transplant) mice that were lethally irradiated and transplanted with *Pggt1b<sup>fl/fl</sup>LC* and wild-type

BM, respectively. The mice were killed 14 weeks after transplantation. E, erosion; S, synovium. Scale bar, 200  $\mu\text{m}$  (B) Synovitis and bone erosion evaluated in knee, ankle, metatarsal, elbow, wrist, and metacarpal joints of wild-type (8 weeks old at transplant) and *Pggt1b<sup>fl/fl</sup>*LC (12 weeks old at transplant) mice transplanted with wild-type and *Pggt1b<sup>fl/fl</sup>*LC BM, respectively ( $n = 4/\text{genotype}$ ). The mice were killed 14 weeks after transplantation. Data are expressed as mean  $\pm$  SEM.

**Supplementary Figure 3** (A) Western blots illustrating the reduced electrophoretic mobility of affinity purified RAC1 in extracts of *Pggt1b<sup>fl/fl</sup>*LC compared to *Pggt1b<sup>fl/+</sup>*LC BM macrophages in multiple experiments. Protein extracts were resolved on 10% or 12% Tris-HCl Protean gels with the 20 kDa molecular weight marker run to the lower end of the gel. (B) Western blot illustrating the reduced migration of affinity purified RAC1 in extracts of *Pggt1b<sup>fl/fl</sup>*LC BM macrophages and *Pggt1b<sup>fl/+</sup>*LC BM macrophages incubated with 10  $\mu\text{M}$  GGTI for 24 h. (C) Western blots of lysates from *Rac1<sup>fl/fl</sup>* mouse embryonic fibroblasts incubated with adenoviruses expressing Cre (to produce *Rac1* null cells) or  $\beta$ -gal (to produce control parental cells) to document the specificity of the RAC1 antibodies from Millipore (used in Figure 3D, 3F and 3G) and Pierce (used in Figure 3A and Supplementary Figure 3A). (D) Confocal micrographs documenting the specificity of the RAC1 antibody used for immunocytochemistry (ARC03, Cytoskeleton) in Figure 3E and Supplementary Figure 3D. Note reduced immunofluorescence of RAC1 in cells incubated for 3 d with a *RAC1*-shRNA lentivirus compared to control *RAC2*-shRNA lentivirus. Scale bar, 100  $\mu\text{m}$ . (E) Confocal micrographs showing immunofluorescence staining of RAC1 and prelamin A in *Pggt1b<sup>fl/fl</sup>*LC and *Pggt1b<sup>fl/+</sup>*LC BM macrophages incubated with 5  $\mu\text{M}$  FTI and 10  $\mu\text{M}$  GGTI for 24 h. Evidence that the GGTI was inhibiting GGTase-I is illustrated by the reduced cell adhesive area of the *Pggt1b<sup>fl/+</sup>*LC cells. Evidence that the FTI was inhibiting FTase is illustrated by the prelamin A staining (prelamin A is normally farnesylated by FTase and rapidly processed to mature lamin A; when FTase is inhibited, nonfarnesylated prelamin A accumulates and is detected by the antibody). Scale bars, 10  $\mu\text{m}$ .

**Supplementary Figure 4** (A) RT-QPCR analyses confirming the increased expression of the indicated genes in LPS-stimulated *Pggt1b<sup>fl/fl</sup>*LC compared to *Pggt1b<sup>fl/+</sup>*LC BM macrophages ( $n = 3/\text{genotype}$ ). The primers were different from those used in Figures 4E and F. (B) RT-QPCR analyses showing relative expression of the genes in A using cDNA from LPS-stimulated *Pggt1b<sup>fl/fl</sup>*LC and *Pggt1b<sup>fl/+</sup>*LC intraperitoneal (IP) macrophages. Data are expressed as the mean ( $n = 3/\text{genotype}$ ).

# Supplementary Figure 1

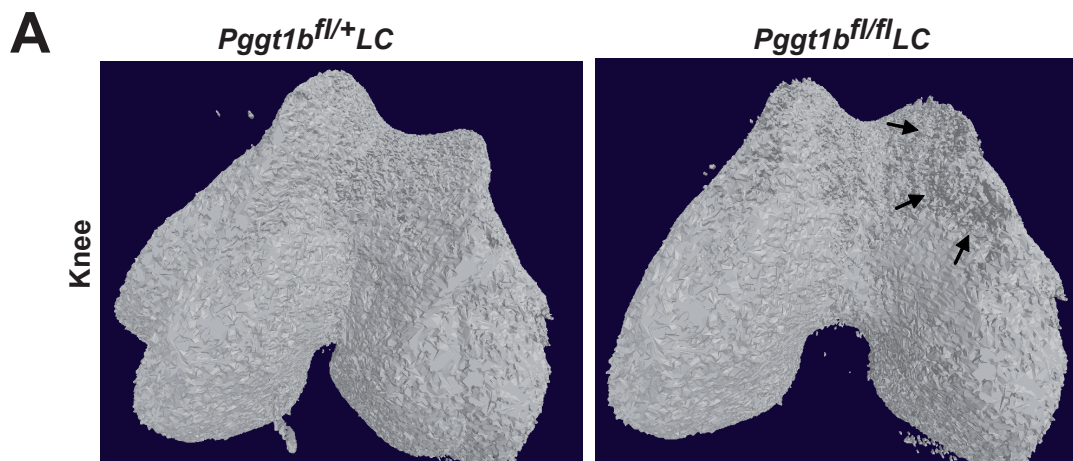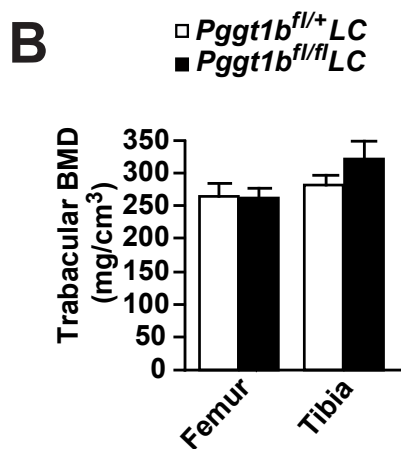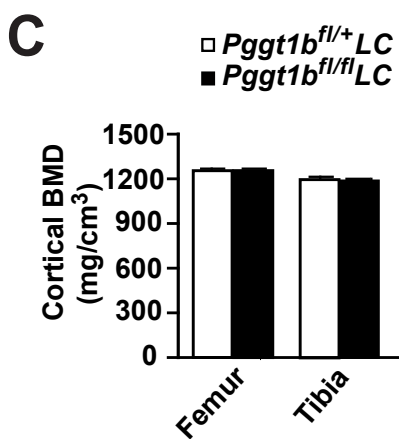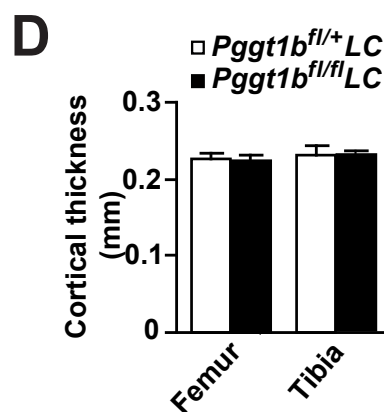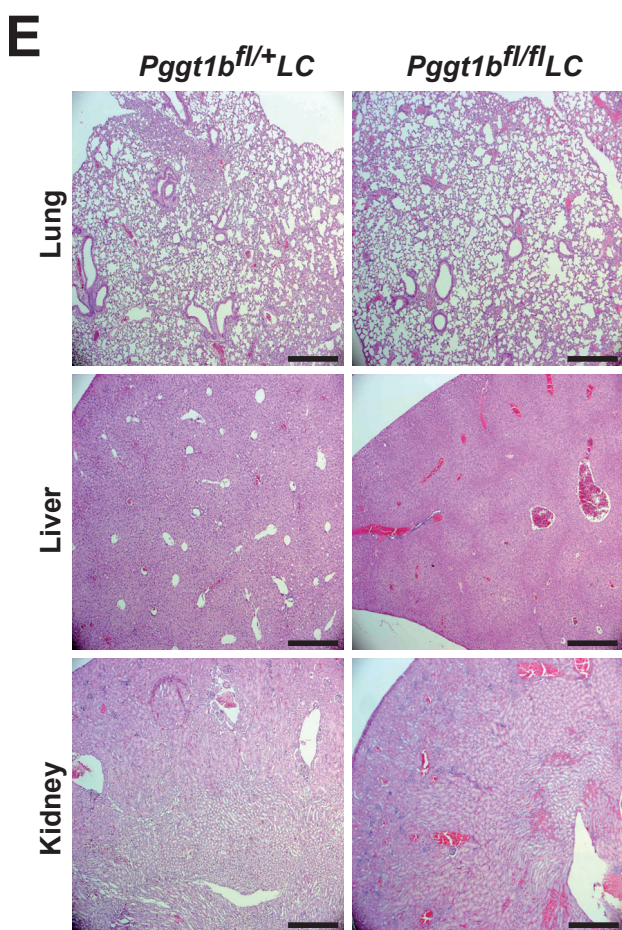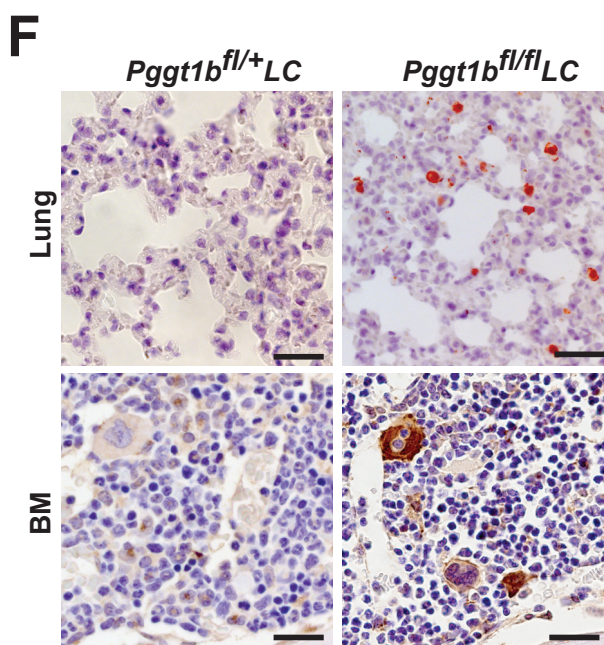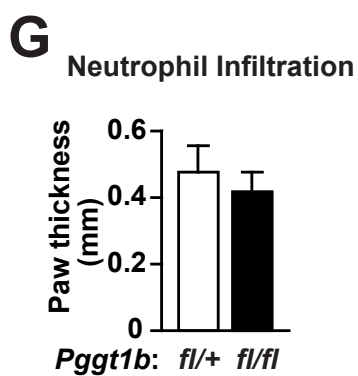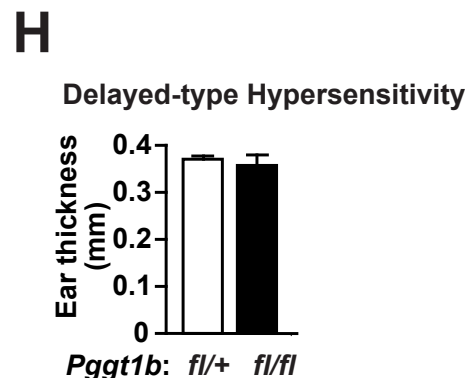

# Supplementary Figure 2

**A**

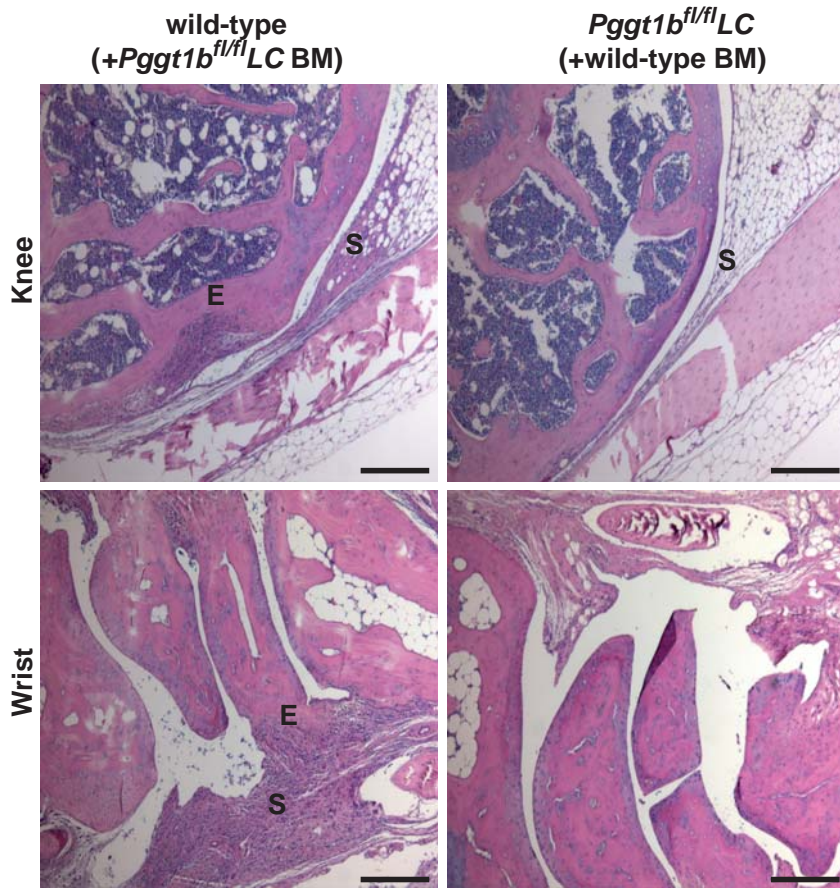

**B**

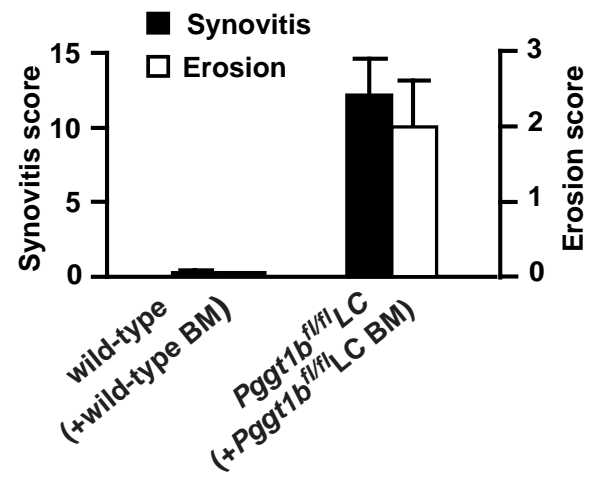

# Supplementary Figure 3

**A**

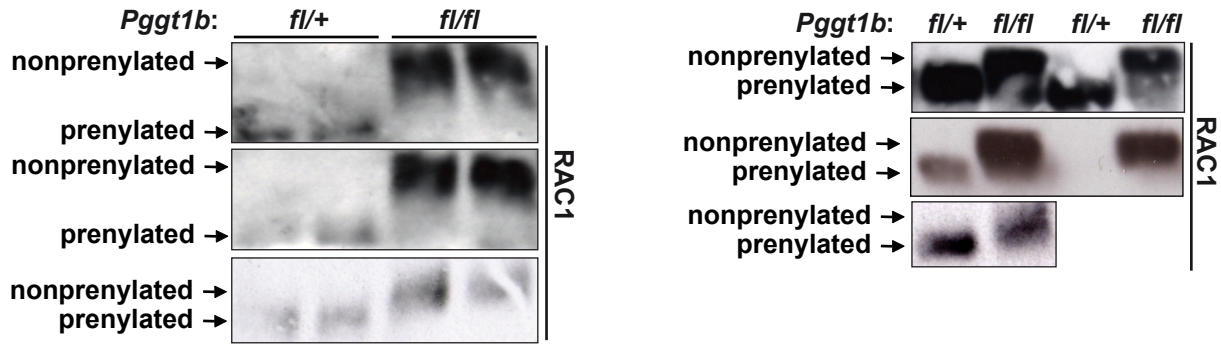

**B**

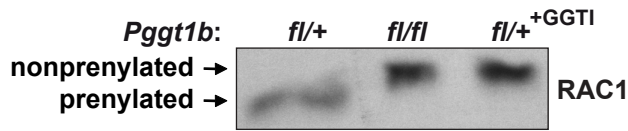

**C**

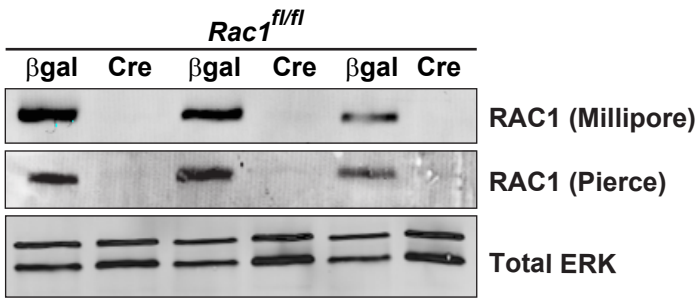

**D**

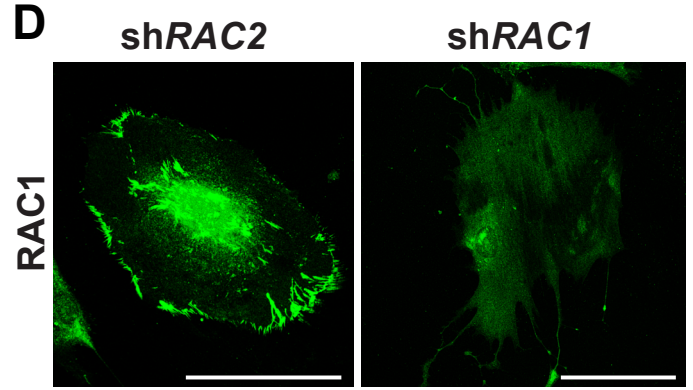

**E**

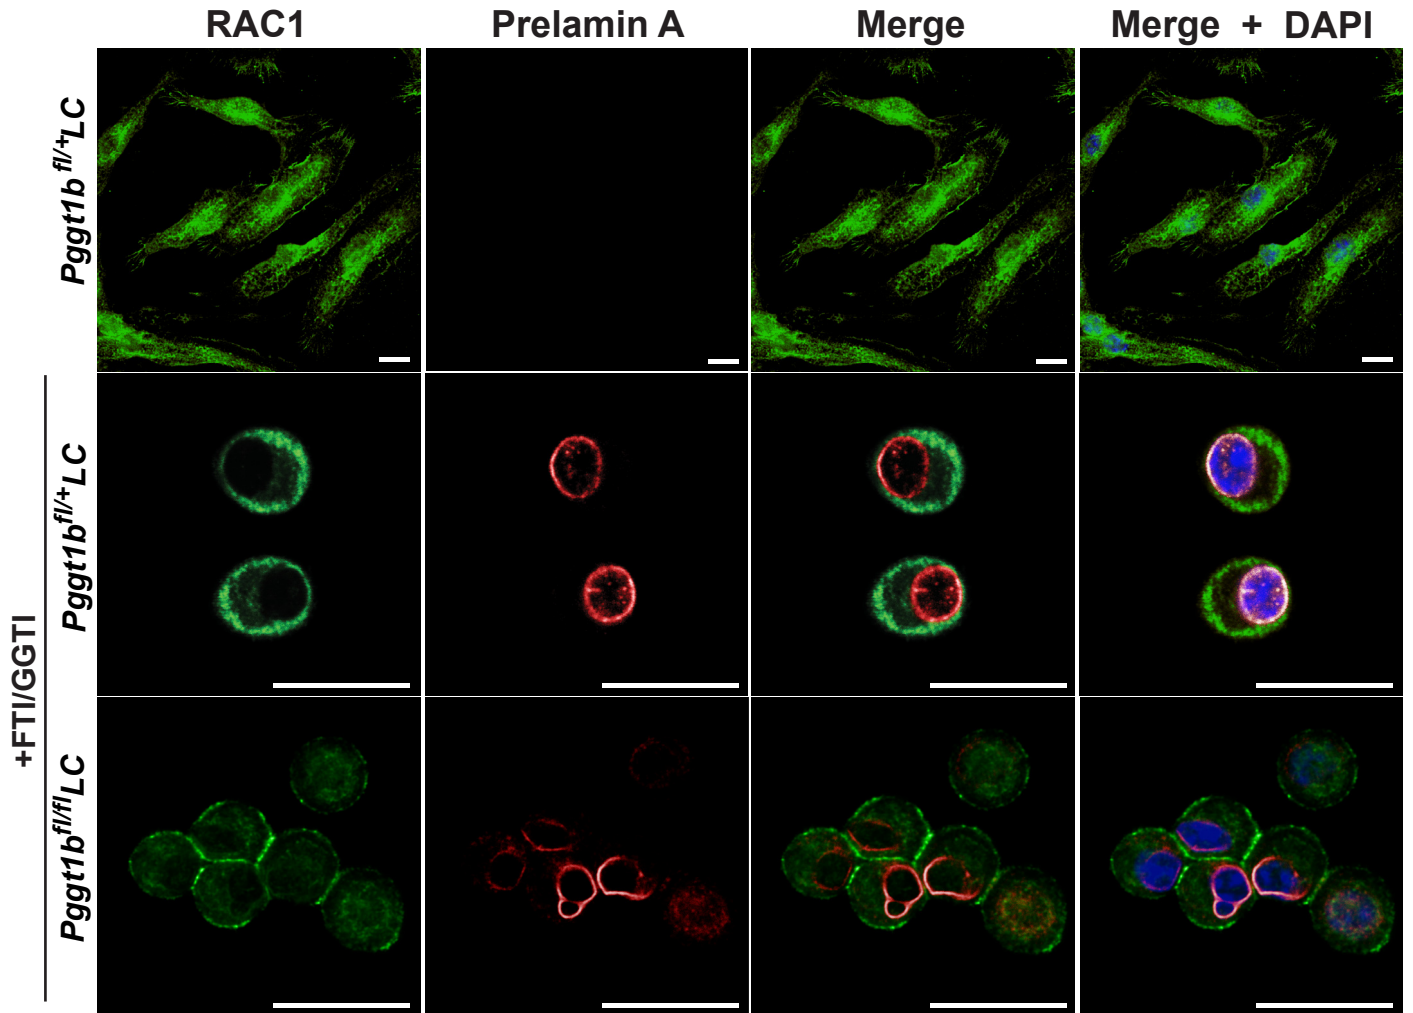



# Supplementary Figure 4

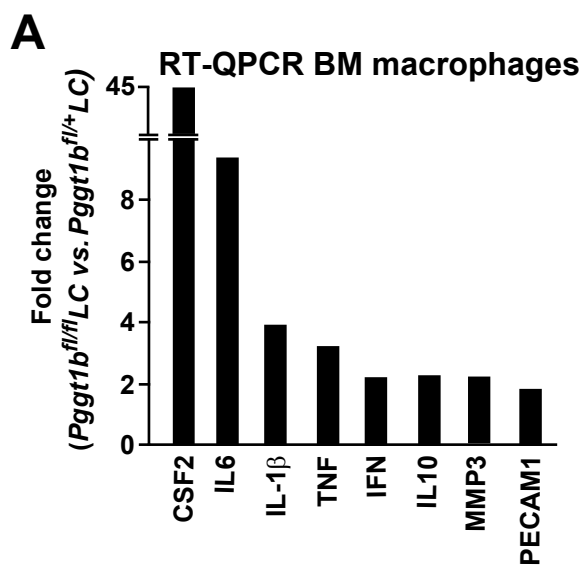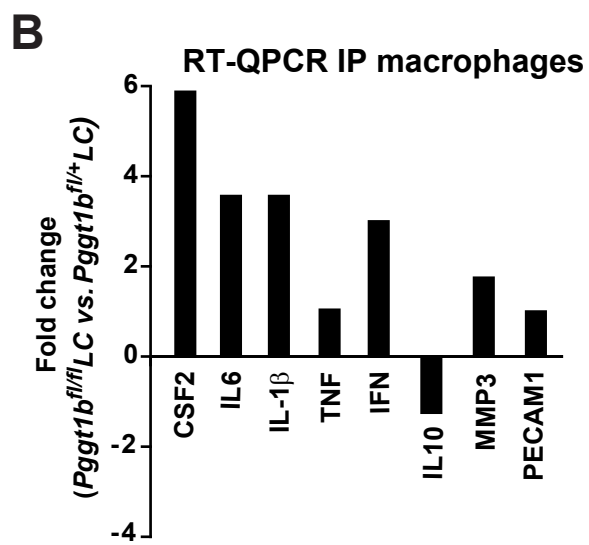

# Supplementary Table 1

## Mouse NF $\kappa$ B Signaling Pathway PCR Array (*Pggt1b<sup>fl/fl</sup>*LC vs *Pggt1b<sup>fl/+</sup>*LC)

| Gene   | Fold change | p value | Gene      | Fold change | p value |
|--------|-------------|---------|-----------|-------------|---------|
| Akt1   | 1.28        | 0.435   | Nfkb1     | 1.73        | 0.254   |
| Atf1   | 1.40        | 0.196   | Nfkb2     | 1.17        | 0.686   |
| Atf2   | 2.15        | 0.112   | Nfkbia    | 1.31        | 0.556   |
| Bcl10  | 1.59        | 0.292   | Pcaf      | 1.34        | 0.227   |
| Bcl3   | 2.27        | 0.060   | Eif2ak2   | 0.95        | 0.816   |
| C3     | 1.31        | 0.521   | Raf1      | 1.63        | 0.035   |
| Card10 | 1.95        | 0.121   | Rel       | 2.06        | 0.031   |
| Nod1   | 1.40        | 0.486   | Rela      | 1.22        | 0.481   |
| Casp1  | 1.11        | 0.764   | Relb      | 1.20        | 0.614   |
| Casp8  | 1.37        | 0.473   | Ripk1     | 1.17        | 0.702   |
| Ccl2   | 2.74        | 0.072   | Ripk2     | 1.48        | 0.408   |
| Cflar  | 2.42        | 0.113   | Slc20a1   | 1.24        | 0.576   |
| Chuk   | 1.64        | 0.154   | Smad3     | 0.64        | 0.365   |
| Crebbp | 1.53        | 0.150   | Stat1     | 0.84        | 0.638   |
| Csf2   | 44.75       | 0.00001 | Tbk1      | 1.46        | 0.270   |
| Csf3   | 15.82       | 0.00006 | Tgfr1     | 0.71        | 0.312   |
| Edg2   | 1.66        | 0.176   | Tgfr2     | 0.50        | 0.007   |
| Egr1   | 2.05        | 0.144   | Tlr1      | 1.29        | 0.304   |
| Elk1   | 0.98        | 0.957   | Tlr2      | 0.89        | 0.619   |
| F2r    | 2.91        | 0.012   | Tlr3      | 0.49        | 0.010   |
| Fadd   | 1.14        | 0.815   | Tlr4      | 1.70        | 0.154   |
| Fasl   | 1.64        | 0.246   | Tlr6      | 1.34        | 0.442   |
| Fos    | 0.71        | 0.525   | Tlr7      | 1.04        | 0.935   |
| Gja1   | 4.26        | 0.012   | Tlr8      | 0.56        | 0.153   |
| Htr2b  | 1.07        | 0.892   | Tlr9      | 0.50        | 0.136   |
| Icam1  | 1.27        | 0.509   | Tnf       | 4.00        | 0.010   |
| Irfng  | 2.87        | 0.058   | Tnfaip3   | 2.98        | 0.043   |
| Ikbkb  | 1.61        | 0.190   | Tnfrsf10b | 1.04        | 0.876   |
| Ikbke  | 1.01        | 0.971   | Tnfrsf1a  | 1.07        | 0.615   |
| Ikbkg  | 1.82        | 0.232   | Tnfrsf1b  | 1.21        | 0.459   |
| Il10   | 2.39        | 0.123   | Cd40      | 1.65        | 0.179   |
| Il1a   | 5.31        | 0.002   | Cd27      | 1.98        | 0.174   |
| Il1b   | 5.73        | 0.001   | Tnfsf10   | 0.41        | 0.001   |
| Il1r1  | 1.09        | 0.867   | Tnfsf14   | 0.97        | 0.906   |
| Il6    | 8.06        | 0.001   | Tollip    | 1.19        | 0.610   |
| Irak1  | 1.06        | 0.902   | Tradd     | 1.10        | 0.710   |
| Irak2  | 1.70        | 0.134   | Traf2     | 0.80        | 0.491   |
| Irf1   | 1.18        | 0.524   | Traf3     | 1.17        | 0.650   |
| Jun    | 1.13        | 0.629   | Zap70     | 2.03        | 0.194   |
| Lta    | 2.83        | 0.007   | Gusb      | 0.96        | 0.841   |
| Ltbr   | 1.09        | 0.793   | Hprt1     | 0.69        | 0.585   |
| Map3k1 | 0.93        | 0.882   | Hsp90ab1  | 1.54        | 0.046   |
| Mapk3  | 1.01        | 0.991   | Gapdh     | 1.09        | 0.669   |
| Myd88  | 1.06        | 0.901   | Actb      | 0.90        | 0.585   |
| Nlrp12 | 2.04        | 0.109   |           |             |         |

## Supplementary Table 2

### Mouse Extracellular Matrix and Adhesion Molecules PCR Array (*Pggt1b<sup>fl/fl</sup>*LC vs *Pggt1b<sup>fl/+</sup>*LC)

| Gene    | Fold change | p value | Gene     | Fold change | p value |
|---------|-------------|---------|----------|-------------|---------|
| Adamts1 | 4.45        | 0.025   | Lama2    | 1.67        | 0.360   |
| Adamts2 | 4.04        | 0.184   | Lama3    | 1.12        | 0.862   |
| Adamts5 | 2.27        | 0.194   | Lamb2    | 1.43        | 0.396   |
| Adamts8 | 1.94        | 0.275   | Lamb3    | 1.52        | 0.415   |
| Ctnna1  | 2.30        | 0.170   | Lamc1    | 1.32        | 0.578   |
| Ctnna2  | 1.85        | 0.266   | Mmp10    | 3.72        | 0.129   |
| Ctnnb1  | 1.59        | 0.446   | Mmp11    | 1.24        | 0.709   |
| Cd44    | 3.40        | 0.062   | Mmp12    | 3.56        | 0.038   |
| Cdh1    | 1.32        | 0.698   | Mmp13    | 3.55        | 0.060   |
| Cdh2    | 4.84        | 0.106   | Mmp14    | 1.26        | 0.660   |
| Cdh3    | 1.81        | 0.288   | Mmp15    | 1.27        | 0.722   |
| Cdh4    | 2.60        | 0.293   | Mmp1a    | 4.23        | 0.056   |
| Cntn1   | 1.96        | 0.225   | Mmp2     | 1.28        | 0.499   |
| Col1a1  | 1.66        | 0.699   | Mmp3     | 7.69        | 0.009   |
| Col2a1  | 2.60        | 0.207   | Mmp7     | 2.26        | 0.203   |
| Col3a1  | 5.88        | 0.101   | Mmp8     | 1.62        | 0.180   |
| Col4a1  | 2.12        | 0.175   | Mmp9     | 1.61        | 0.303   |
| Col4a2  | 1.84        | 0.179   | Ncam1    | 2.82        | 0.067   |
| Col4a3  | 1.52        | 0.544   | Ncam2    | 2.01        | 0.227   |
| Col5a1  | 3.17        | 0.240   | Pecam1   | 2.00        | 0.046   |
| Col6a1  | 3.41        | 0.196   | Postn    | 2.61        | 0.183   |
| Vcan    | 2.98        | 0.080   | Sele     | 2.30        | 0.239   |
| Ctgf    | 2.98        | 0.463   | Sell     | 4.72        | 0.005   |
| Ecm1    | 2.40        | 0.062   | Selp     | 3.90        | 0.062   |
| Emilin1 | 1.02        | 0.964   | Sgce     | 9.74        | 0.126   |
| Entpd1  | 1.00        | 0.994   | Sparc    | 3.08        | 0.388   |
| Fbln1   | 1.67        | 0.549   | Spock1   | 1.81        | 0.289   |
| Fn1     | 81.06       | 0.002   | Spp1     | 1.23        | 0.611   |
| Hapln1  | 1.81        | 0.289   | Syt1     | 1.85        | 0.264   |
| Hc      | 1.84        | 0.063   | Tgfbi    | 0.49        | 0.082   |
| Icam1   | 1.98        | 0.201   | Thbs1    | 2.65        | 0.070   |
| Itga2   | 3.31        | 0.148   | Thbs2    | 5.82        | 0.067   |
| Itga3   | 2.72        | 0.180   | Thbs3    | 2.97        | 0.017   |
| Itga4   | 1.63        | 0.273   | Timp1    | 1.81        | 0.287   |
| Itga5   | 1.87        | 0.160   | Timp2    | 0.69        | 0.419   |
| Itgae   | 1.63        | 0.478   | Timp3    | 2.53        | 0.356   |
| Itgal   | 1.85        | 0.323   | Tnc      | 0.58        | 0.605   |
| Itgam   | 1.81        | 0.253   | Vcam1    | 1.86        | 0.280   |
| Itgav   | 1.58        | 0.443   | Vtn      | 1.53        | 0.579   |
| Itgax   | 1.26        | 0.761   | Gusb     | 1.12        | 0.579   |
| Itgb1   | 1.64        | 0.294   | Hprt1    | 0.58        | 0.530   |
| Itgb2   | 2.31        | 0.048   | Hsp90ab1 | 1.45        | 0.175   |
| Itgb3   | 1.75        | 0.382   | Gapdh    | 1.28        | 0.175   |
| Itgb4   | 1.31        | 0.674   | Actb     | 0.82        | 0.451   |
| Lama1   | 1.83        | 0.288   |          |             |         |
